# Supplementary material
Source: PubMed Central journal article supplement (PMC3807465)
Supplement: JB.00655-13_zjb999092808so1.pdf [file JB.00655-13_zjb999092808so1.pdf]

## Supplemental Material for Online Posting

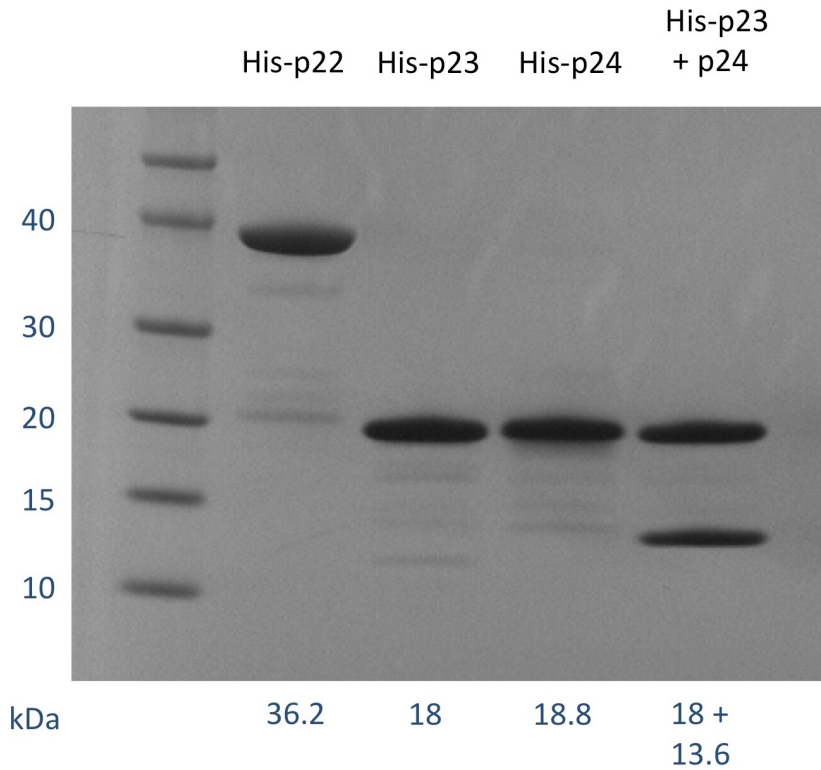

**Fig S1.** Following expression and purification methods as described, the recombinant his-tagged Wip1 proteins were then measured using standard BSA assays. Protein solutions were diluted to concentrations of 250  $\mu\text{g/ml}$  for single protein samples (his-p22; his-p23; his-p24) and 500  $\mu\text{g/ml}$  for co-expressed protein samples (his-p23 + p24). SDS-PAGE analysis of these protein samples revealed purification to near homogeneity. The samples shown here are the exact samples used in the following protein overlay-based inhibition assays.

Table S1. Comparative table of Wip1 host range and his-p23 binding

| Strain/ protein               | Infectivity (PFU/ml) |         | Adsorption (%) | Immunofluorescence |               |
|-------------------------------|----------------------|---------|----------------|--------------------|---------------|
|                               | Wgamma               | Wip1    | Wip1           | his-p23            | his-p23 + p24 |
| <i>Bacillus anthracis</i>     |                      |         |                |                    |               |
| delta Sterne                  | 3.0E+09              | 6.0E+09 | 100            | +                  | +             |
| <i>Bacillus cereus</i>        |                      |         |                |                    |               |
| ATCC 4342                     | 1.0E+05              | < 10    | < 5            | -                  | -             |
| CDC32805                      | 4.0E+07              | 3.0E+07 | 94             | +                  | +             |
| CDC13100                      | < 10                 | < 10    | < 5            | -                  | -             |
| CDC13140                      | < 10                 | < 10    | < 5            | -                  | -             |
| ATCC 10987                    | < 10                 | < 10    | < 5            | -                  | -             |
| NRL 569                       | < 10                 | < 10    | < 5            | -                  | -             |
| <i>Bacillus thuringiensis</i> |                      |         |                |                    |               |
| HD1                           | < 10                 | < 10    | < 5            | -                  | -             |
| HD73                          | < 10                 | < 10    | < 5            | -                  | -             |

Bacterial strains that support Wip1 infectivity and adsorption showed positive labeling by immunofluorescent his-p23 and his-p23 + p24 complex. Bacterial strains resistant to Wip1 activity were not labeled by his-p23 or his-p23 + p24 complex. The lower limit of detection of infectivity is indicated by "< 10", while the lower limit of detection of adsorption is indicated by "< 5".
